# Supplementary material for: Planktonic cnidarian responses to contrasting thermohaline and circulation seasonal scenarios in a tropical western boundary current system
Source: Copernicus journal article supplement (doi:10.5194/os-18-1763-2022), 2022-12-15
Supplement: Supplementary file 1 [file os-18-1763-2022-supplement.zip]

Archive with 3 entries (3 files):
- Supplementary files.docx
- Supplementary table S2.csv
- os-18-1763-2022-supplement-title-page.pdf
