# Supplementary material for: Planktonic cnidarian responses to contrasting thermohaline and circulation seasonal scenarios in a tropical western boundary current system
Source: Copernicus journal article supplement (doi:10.5194/os-18-1763-2022), 2022-12-15
Supplement: Supplementary file 1 [file os-18-1763-2022-supplement.zip › os-18-1763-2022-supplement-title-page.pdf]

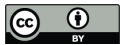

*Supplement of*

**Planktonic cnidarian responses to contrasting thermohaline and circulation seasonal scenarios in a tropical western boundary current system**

**Everton Giachini Tosetto et al.**

*Correspondence to:* Everton Giachini Tosetto (evertontosetto@hotmail.com)

- os-18-1763-2022-supplement-title-page.pdf
- Supplementary files.docx
- Supplementary table S2.csv

The copyright of individual parts of the supplement might differ from the article licence.
