# Supplementary material for: Planktonic cnidarian responses to contrasting thermohaline and circulation seasonal scenarios in a tropical western boundary current system
Source: Copernicus journal article supplement (doi:10.5194/os-18-1763-2022), 2022-12-15
Supplement: Supplementary file 1 [file os-18-1763-2022-supplement.zip › Supplementary table S2.csv]

Supplementary table S2. Data
Id_Station	Day_Night	Province	Area	Hydromedusae NI	Scyphomedusae NI	Siphonophore NI		Aequorea spp.	Aglaura hemistoma	Amphinema spp.	Annatiara affinis	Anthomedusae sp.1	Anthomedusae sp.2	Anthomedusae sp.3	Anthomedusae sp.4	Anthomedusae sp.5	Bougainvillia muscus	Bougainvillia platygaster	Cirrholovenia polynema	Cirrholovenia tetranema	Clytia spp.	Cnidocodon leopoldi	Corymorpha gracilis	Cunina frugifera	Cunina octonaria	Cytaeis spp.	Ectopleura sp.	Eirenidae spp.	Eutima mira	Hydractynia sp.	Laodicea brevigona	Laodicea sp.	Laodiceidae sp.	Liriope tetraphylla A	Liriope tetraphylla J	Liriope tetraphylla	Lovenelidae sp.	Orchistoma sp.	Pegantha clara	Pegantha triloba	Pegatha rubidinosa	Pelagohydra sp.	Porpita porpita	Proboscidactyla ornata	Rhopalonema velatum	Rhopalonematidae sp.	Sminthea eurygaster	Solmundella bitentaculata	Teissiera polypofera
A1_1	N	Offshore	SECS	1.994230754	0	2.991346131		0	5.317948678	0	0	0	0	0	0	0	0	0	0	0	1.994230754	0	0	0	0	0	0	0	0.332371792	0	0	0	0.332371792	0.997115377	3.323717924	4.320833301	0	0	0	0	0	0	0	0	0	0	0	0.332371792	0
A1_2	D	Offshore	SECS	0.981719786	0.245429946	1.227149732		0.245429946	11.9033524	0	0	0	0	0	0	0	0	0	0	0	0	0	0	0	0	0.36814492	0	0	0	0	0	0	0	1.104434759	0.490859893	1.595294652	0	0	0	0	0	0	1.227149732	0	0	0	0	0	0
A1_3	N	Offshore	SECS	2.278111589	0.683433477	1.366866954		0	21.6420601	0	0	0	0	0	0	0	0	0	0	0	0	0	0	1.139055795	0	0	0	1.366866954	0	0	0	0	0	0.911244636	0.683433477	1.594678113	0	0	0	0	0	0	0	0	0	0	0	0	0
A1_4	D	Offshore	SECS	1.884467307	0.376893461	1.884467307		0	44.66187519	0	0	0	0	0	0	0	0	0	0	0	0	0	0	0	0	0.376893461	0	0	0	0	0	0.188446731	0	0	0.188446731	0.188446731	0	0	0	0	0	0	0	0	0	0	0	0	0
A1_5	N	Offshore	SECS	0.750109914	0	0.250036638		0	9.751428877	0	0	0	0	0	0	0	0	0	0	0	0	0	0	0.750109914	0	0.250036638	0	0	0	0	0	0	0	0.250036638	0	0.250036638	0	0	0	0	0	0	0	0	0	0	0	0	0
A1_6	D	Offshore	SECS	1.201756114	0	0.300439028		0	2.103073199	0	0	0	0	0	0	0	0	0	0	0	0	0	0	0	0	0	0	0	0	0	0	0	0	0.600878057	0	0.600878057	0	0	0	0	0	0	0	0	0	0	0	0	0
A1_7	N	Offshore	SECS	1.928795624	0	0.42862125		0.214310625	9.429667495	0.214310625	0	0	0	0	0	0	0	0	0.214310625	0	28.07469186	0	0	0.214310625	0	0.214310625	0	0	0	0	0	0	0	1.928795624	1.285863749	3.214659373	0	0	0.42862125	0	0	0	0	0	0.8572425	0	0.214310625	1.071553124	0
A1_8	D	Offshore	SECS	0	0	2.79779946		0	23.08184555	0	0	0	0	0	0	0	0	0	0	0	0	0	0	0	0	0	0	0	0	0	0	0	0	2.448074528	0.699449865	3.147524393	0	0	0	0	0	0	0	0	0	0	0	0	0
A1_9	N	Offshore	SECS	3.300763642	0	1.100254547		0.275063637	69.59110012	0	0	0	0	0	0	0	0	0	0	0	1.650381821	0	0	0.275063637	0	0	0	0	0	0	0	0	0	1.100254547	2.750636369	3.850890916	0	0	0	0	0	0	0	0	0	0	0	0.550127274	0
A1_11	D	Offshore	SECS	1.028728401	0	4.457823071		0.342909467	10.97310294	0	0	0	0	0	0	0	0	0	0	0	0	0	0	0	0	0.685818934	0	0	0	0	0	0	0	1.028728401	1.714547335	2.743275736	0	0	0	0	0	0	0	0	0	0	0	0.342909467	0
A1_12	N	Offshore	SECS	0	0	6.780985401		0	20.3429562	0	0	0	0	0	0	0	0	0	0	0	0	0	0	0	0	0	0	0	0	0	0	0	0	0	1.4530683	1.4530683	0	0	0	0	0	0	0	0	0	0	0	0.9687122	0
A1_13	D	Offshore	SECS	1.320182248	0	4.95068343		0	19.47268816	0	0	0	0	0	0	0	0	0	0	0	0	0	0	0	0	0	0	0	0	0	0	0	0	1.320182248	3.30045562	4.620637868	0	0	0	0	0	0	0	0	0.330045562	0	0	0	0
A1_14	N	Offshore	SECS	1.886779537	0	3.144632562		0.314463256	14.15084653	0	0	0	0	0	0	0	0	0	0	0	0	0	0	0	0	0.314463256	0	0	0	0	0	0	0	0.943389769	2.51570605	3.459095818	0	0	0	0	0	0	0	0	0	0	0	2.51570605	0
A1_20	N	Offshore	SECS	0	0	2.378915893		0	7.816437934	0	0	0	0	0	0	0	0	0	0	0	0	0	0	0	0	0	0	0	0	0	0	0	0	1.019535383	4.078141531	5.097676914	0	0	0	0	0	0	0	0	0	0	0	1.35938051	0
A1_22	N	Offshore	SECS	3.104470698	0	3.880588372		0	31.56211876	0	0	0	0	0	0	0	0	0	0	0	0	0	0	0	0	0.258705891	0	0	0	0	0	0	0	0.776117674	6.208941396	6.98505907	0	0	0	0	0	0	0	0	0.258705891	0	0	1.552235349	0
A1_23	D	Slope	WBCS	1.068026043	0	2.492060768		0	5.696138898	0	0	0	0	0	0	0	0	0	0	0	0.356008681	0	0	0	0	0	0	0	0	0	0	0	0	0	1.246030384	1.246030384	0	0	0	0	0	0	0	0	0.178004341	0	0.534013022	0	0
A1_25	N	Slope	WBCS	0.818696352	0	8.596311701		0	267.7137073	0	0	0	0	0	0	0	0.409348176	0	0	0	0	0	0	0	0	0	0	0	0	0	0	0	0	2.046740881	2.865437234	4.912178115	0	0	0	0	0	0	0	0	0	0	0	0.409348176	0
A1_26	D	Slope	WBCS	6.289984171	0	9.285214729		0.299523056	31.44992086	0	0.898569167	0	0	0	0	0	0	0	0	0	0	0	0	0	0	0	0	0	0	0	0	0	0	4.492845837	13.47853751	17.97138335	0	0	0	0	0	0	0	0	0	0	0	0.898569167	0
A1_27	N	Shelf	Shelf	0	0	19.91893051		0	9.727849783	0	0	0	0	0	0	0	0	0	0	0	0	0	0	0	0	0	0	0	0	0	0	0	0	0	0	0	0	0	0	0	0	0	0	0	0	0	0	0	0
A1_29	D	Shelf	Shelf	1.185641382	0	0.790427588		0	29.64103455	0	0	0	0	0	0	0	0	0	0	0	0	0	0	0	0	0	0	0	0	0	0	0	0	9.089917262	6.323420704	15.41333797	0	0	0	0	0	0	0	0	0	0	0	0	0
A1_31	N	Slope	WBCS	2.554545498	0	0		0	19.15909124	0	0	0	0	0	0	0	0	0	0	0.638636375	0	0	0	0	0	0	0	0	0	0	0	0	0	1.915909124	1.277272749	3.193181873	1.277272749	0	0	0	0	0	0	0	0.638636375	0	0	1.277272749	0
A1_33	D	Shelf	Shelf	0	0	0.825576154		0	4.953456922	0	0	0	0	0	0	0	0	0	0	0	0	0	0	0	0	0	0	0	0	0	0	0	0	0.825576154	0.825576154	1.651152307	0	0	0	0	0	0	0	0	0	0	0	0	0
A1_34	N	Slope	WBCS	0.779281314	0	1.818323066		0	6.494010948	0	0	0	0	0	0	0	0	0	0	0	0	0	0	0	0	0.129880219	0	0	0	0	0	0	0	0.519520876	0.519520876	1.039041752	0	0	0	0	0	0	0	0	0.129880219	0	0	0	0
A1_36	N	Slope	WBCS	0.697071839	0	2.265483476		0	1.394143678	0	0	0	0	0	0	0	0.17426796	0	0	0	0	0	0	0	0	0	0	0	0	0	0	0	0	0	0	0	0	0	0	0	0	0	0	0	0	0	0	0.17426796	0
A1_37	D	Shelf	Shelf	18.08163723	0	3.616327446		0	7.232654893	0	0	0	0	0	0	0	0	0	0	0	0	0	0	0	0	0	0	0	0	0	0	0	0	15.36939165	10.84898234	26.21837399	0	0	0	0	0	0	0	0	0	0	0	6.328573031	0
A1_40	N	Shelf	Shelf	1.833472391	0	1.833472391		0	20.77935377	0	0	0	0	0	0	0	0	0	0	0	0	0	0.611157464	0	0	0	0	0	0	0	0	0	0	0	0.611157464	0.611157464	0	6.722732101	0	0	0	0	0	0	0	0	0	0	0
A1_41	N	Shelf	Shelf	0.515263439	0	1.030526877		0	3.60684407	0	0	0	0	0	0	0	0	0	0	0	0	0	0.515263439	0	0	0	0	0	0	0	0	0	0	37.61423102	2.061053754	39.67528477	0	0	0	0	0	0	0	0	0	0	0	0	0
A1_43	N	Shelf	Shelf	0.955366894	0	0		0	15.28587031	0	0	0	0	0	0	0	0	0	0	0.955366894	0	0	1.910733789	0	0	0	1.910733789	0	0	0	0	0	0	17.1966041	21.01807167	38.21467577	0	0	0	0	0	0	0	6.68756826	0	0	0	0	0
A1_45	D	Shelf	Shelf	1.655790376	0	0		0	16.55790376	0	0	0	0	0	0	0	0	0	0	0.827895188	0.827895188	0	0	0	0	0	0	0	0	0	0	0	0	9.106847067	6.623161503	15.73000857	0	0	0	0	0	0	0	0	0	0	0	0	0
A1_48	N	Shelf	Shelf	1.580325399	0	0		0	77.43594454	0	0	0	0	0	0	0	0	0	0	12.64260319	0	0	0	0	0	0	0	0	0	0	0	0	0	4.740976197	7.901626994	12.64260319	0	0	0	0	0	0	0	1.580325399	0	0	0	0	0
A1_49	D	Shelf	Shelf	17.1966041	0	1.910733789		2.866100683	134.7067321	0	1.910733789	1.910733789	0.955366894	0	0	0	0	0	0	0	94.58132253	0	0	0	0	6.68756826	0	0	0	0	0	0	0	22.92880546	21.01807167	43.94687714	0	0	0	0	0	0	0	0	0	0	0	0.955366894	2.866100683
A1_51	N	Slope	WBCS	7.425385522	0	7.425385522		1.142367003	27.70239983	0	1.142367003	0	0	0	0	0	0	0	0	0	0	0	0	0	0	0.571183502	0	0	0	0	0	0	0	4.569468014	0.856775253	5.426243266	0	0	0.285591751	0	0	0	0	0	0	0	0	1.142367003	0
A1_52	D	Slope	WBCS	18.20893612	0	3.811172675		0	41.07597217	0	0.846927261	0	0	0.423463631	0	0	0	0	0	0	2.964245414	0	0	0	0	0.846927261	0	0	0	0	0	0	0	15.2446907	4.234636306	19.47932701	0	0	0	0	0	0	2.117318153	0	0	0	0	1.693854522	0.423463631
A1_54	N	Shelf	Shelf	1.00762628	0	1.00762628		0	28.21353584	0	0	0	0	0	0	0	0	0	0	0	0	0	3.02287884	0	0	0	0	0	0	0	0	0	0	14.10676792	7.05338396	21.16015188	0	0	0	0	0	0	0	0	0	0	0	0	0
A2_2	N	Slope	WBCS	2.823197271	0	2.823197271		0	5.175861663	0	0.470532878	0	0	0	0	0	0.470532878	0	0	0	0	0	0	0	0	0	0	0	0	0.470532878	0	0	0	1.411598635	1.882131514	3.293730149	0	0	0	0	0	0	0	0	0	0	0	0	0
A2_3	D	Shelf	Shelf	21.65205153	0	2.165205153		0	0	0	0	0	0	0	0	0	0	0	0	0	0	0	6.49561546	0	12.99123092	0	0	0	0	0	0	0	0	67.12135975	223.0161308	290.1374905	0	0	0	0	0	0	0	0	0	0	0	0	0
A2_4	D	Shelf	Shelf	6.781959986	0	0		0	15.8245733	0	0	0	0	0	0	0	0	0	0	0	0	0	0	0	0	0	0	0	0	0	2.260653329	0	0	4.521306658	9.042613315	13.56391997	0	0	0	0	0	0	0	0	4.521306658	0	0	0	0
A2_5	N	Slope	WBCS	2.890382253	0	2.890382253		0	9.393742322	0	0	0	0	0	0	0	0	0	0	0	0	0	0	0	0	0.722595563	0	0	0	0	0	0	0	3.612977816	2.890382253	6.503360069	0	0	0	0	0	0	0.722595563	0	0	0	0	0	0
A2_6	D	Slope	WBCS	6.498992656	0	3.899395594		1.299798531	14.29778384	0	0	0	0	0	0	0	0	0	0	0	1.299798531	0	0	0	0	1.299798531	0	0	0	0	0	0	0	3.899395594	18.19717944	22.09657503	0	0	0	0	0	0	0	3.899395594	0	0	0	0	0
A2_10	N	Shelf	Shelf	14.0016802	0	2.80033604		0	184.8221787	0	0	0	0	0	0	0	0	0	0	0	5.600672081	11.20134416	0	0	0	5.600672081	0	0	0	0	0	0	0	5.600672081	28.0033604	33.60403248	0	0	0	0	0	0	0	8.401008121	0	0	0	0	0
A2_11	N	Slope	WBCS	3.1092916	0	11.40073587		0	41.45722133	0	0	0	0	0	0	0	0	0	0	0	0	0	0	0	0	1.036430533	0	0	0	0	0	0	0	0	2.072861066	2.072861066	0	0	0	1.036430533	0	0	0	0	0	0	0	0	0
A2_13	D	Slope	WBCS	2.99141464	0	6.581112208		0	13.76050734	0	0	0	0	0	0	0	0	0	0	0	0	0	0	0	0	0.598282928	0	0	0	0.598282928	0	0	0	1.794848784	4.187980496	5.98282928	0	0	0	0	0	0	0	0	0	0	0	0.598282928	0
A2_15	N	Shelf	Shelf	43.47070075	0	10.43296818		0	26.08242045	3.47765606	0	0	0	0	0	0	0	0	0	1.73882803	0	0	0	0	198.2263954	0	0	20.86593636	0	0	0	0	0	196.4875674	573.8132499	770.3008172	0	0	0	0	0	0	0	1.73882803	0	0	0	0	0
A2_16	D	Offshore	WBCS	8.161599674	0	11.42623954		0.816159967	0	0	0	0	0	0	0	0	0	0	0	0	0	0	0	0	0	0	0	0	0	0	0	0	0	0	0.816159967	0.816159967	0	0	0	0	0	0	0	0	0	0	0	0.816159967	0
A2_17	N	Shelf	Shelf	10.21554806	0	0		4.086219226	310.5526612	0	0	0	0	0	0	0	0	0	0	4.086219226	0	0	0	0	0	0	0	0	0	0	0	0	0	0	4.086219226	4.086219226	0	0	0	0	0	0	0	0	0	0	0	2.043109613	0
A2_18	D	Slope	WBCS	5.073566717	0	2.767400028	0	0.922466676	0.461233338	0	0	0	0	0	0	0	0	0.461233338	0	0	0	0.461233338	0	0	0	1.383700014	0	0	0	0	0	0	0	2.767400028	0.922466676	3.689866704	0	0	0	0	0	0	0	0	0	0	0	0	0
A2_19	D	Shelf	Shelf	5.788712012	0	0		0	21.22527738	0	1.929570671	0	0	0	0	0	0	0	0	0	0	0	0	0	0	0	0	0	0	0	0	0	0	0	0	0	0	0	0	0	0	0	0	0	0	0	0	0	0
A2_20	N	Shelf	Shelf	16.33153006	0	18.37297132		0	126.569358	0	0	0	0	0	0	0	0	0	0	0	0	0	0	0	0	0	0	0	0	0	0	0	0	267.4288047	87.78197407	355.2107788	0	0	0	0	0	0	0	0	0	0	0	0	0
A2_21	N	Slope	WBCS	2.55290904	0	8.169308928		0	2.55290904	0	0	0	0	0	0.510581808	0	0.510581808	0	0	0	0	0	0	0	0	0	0	0	0	0	0	0	0	0	0	0	0	0	0	0	0	0	0	0.510581808	0	0	0	0	0
A2_22	D	Shelf	Shelf	9.45961925	0	9.45961925		0	179.7327658	0	0	0	0	0	0	0	0	0	0	0	0	0	0	0	2.364904813	0	0	0	0	0	9.45961925	0	0	144.2591936	9.45961925	153.7188128	0	0	0	0	0	0	0	0	0	0	0	0	0
A2_23	N	Slope	WBCS	7.733619764	0	0		0	29.21589689	0	0.859291085	0	0	0	0	0	0	0	0	0.859291085	0	0	0	0	0	0	0	0	0	0	13.74865736	0	0	2.577873255	2.577873255	5.155746509	0	0	0	1.71858217	0	0	0	0	0	0.859291085	0	0	0
A2_24	D	Shelf	Shelf	15.63477173	0	3.126954346		3.126954346	40.6504065	3.126954346	0	0	0	0	0	0	0	0	0	0	0	0	0	0	0	0	0	0	0	0	0	0	0	181.3633521	247.0293934	428.3927455	0	0	0	0	0	0	0	0	0	0	0	0	0
A2_26	N	Slope	WBCS	5.025546528	0	5.863137616		0	13.40145741	0	0	0	0	0	0	0	0	0.837591088	0	0	0	0	0	0	0	0	0	0	0	0	0	0	0	2.512773264	0.837591088	3.350364352	0	0	0	0	0	0	0	0	0	0	0	0	0
A2_28	D	Slope	WBCS	3.55998576	0	3.55998576		0	9.49329536	0	0	0	0	0	0	0	0	0	0	0	0	0	0	0	0	1.18666192	0	0	0	0	0	0	0	5.9333096	1.18666192	7.11997152	0	0	0	0	0	1.18666192	0	0	0	0	0	1.18666192	0
A2_29	N	Shelf	Shelf	28.21758896	0	6.270575325		0	203.7936981	0	0	0	0	0	0	0	0	0	0	15.67643831	0	0	0	0	0	0	0	0	0	0	53.29989026	0	0	81.51747923	25.0823013	106.5997805	0	0	0	0	0	0	0	0	0	0	0	0	0
A2_31	D	Slope	WBCS	1.860465116	0	12.71317829		0.310077519	0.310077519	0	0	0	0	0	0	0	0	0	0	0	0	0	0	0	0	0	0	0	0	0	0	0	0	2.480620155	0.930232558	3.410852713	0	0	0	0	0	0	0.310077519	0	0	0	0	0	0
A2_34	D	Slope	WBCS	2.662761283	0	9.319664492		0	33.28451604	0	0	0	0	0	0	0	0	0	0	0	0	0	0	0	0	0	0	0	0	0	5.325522567	0	0	6.656903209	0	6.656903209	0	0	0	0	0	0	0	0	0	0	0	0	0
A2_35	N	Slope	WBCS	5.361930295	0	8.042895442		10.72386059	5.361930295	0	0	0	0	0	0	0	0	0	0	0	0	0	0	0	0	0	0	0	0	0	0	0	0	5.361930295	2.680965147	8.042895442	0	0	0	0	0	0	0	0	0	0	0	2.680965147	0
A2_36	N	Slope	WBCS	7.328356158	0	7.328356158		0.91604452	38.47386983	0	0	0	0	0	0	0	0	0	0	0.91604452	0	0	0	0	0	0	0	0	0	0	8.244400678	0	0	15.57275684	6.412311638	21.98506847	0	0	0	0	0	0	0	0	0	0	0	1.83208904	0
A2_39	D	Offshore	Transition	11.89626457	0	5.948132286		79.70497264	2.379252915	0	0	0	0	0	0	0	0	0	0	0	0	0	0	0	0	0	0	0	0	0	0	0	0	1.189626457	1.189626457	2.379252915	0	0	0	0	0	0	0	0	0	0	0	0	0
A2_40	N	Offshore	SECS	1.60939889	0	9.656393337		28.96918001	107.8297256	0	0	0	0	0	0	0	0	0	0	0	0	0	0	0	0	0	0	0	0	0	0	0	0	1.60939889	0	1.60939889	0	0	0	0	0	0	0	0	0	0	0	0	0
A2_41	D	Offshore	SECS	2.135725346	0	10.67862673		0	65.13962304	0	0	0	0	0	0	0	0	0	0	0	0	0	0	0	0	2.135725346	0	1.067862673	0	0	0	0	0	4.271450691	3.203588019	7.47503871	0	0	0	0	1.067862673	0	0	0	0	0	0	0	0
A2_42	N	Offshore	SECS	12.88475304	0	2.863278454		0	38.65425913	0	0	0	0	0	0	0	0	0	0	0	0	0	0	0	0	0	0	0	0	0	0	0	0	2.863278454	1.431639227	4.294917681	0	0	0	0	0	0	0	0	1.431639227	0	0	1.431639227	0
A2_43	D	Offshore	SECS	2.147305132	0	0		2.147305132	23.62035645	0	0	0	0	0	0	0	0	0	0	0	2.147305132	0	0	0	0	2.147305132	0	0	0	0	0	0	0	8.589220528	4.294610264	12.88383079	0	0	0	0	0	0	0	0	0	0	0	0	0
A2_44	N	Offshore	SECS	0	0	0		19.14660832	2.735229759	0	0	0	0	0	0	0	0	0	0	0	0	0	0	0	0	0	0	0	0	0	0	0	0	0	0	0	0	0	0	0	0	0	0	0	0	0	0	0	0
A2_45	D	Offshore	SECS	4.086358374	0	5.448477832		5.448477832	21.79391133	0	1.362119458	0	0	0	0	0	0	0	0	0	0	0	0	0	0	0	0	0	0	0	0	0	0	2.724238916	0	2.724238916	0	0	0	0	0	0	0	0	0	0	0	0	0
A2_46	N	Offshore	SECS	4.84144275	0	20.97958525		3.2276285	20.97958525	0	0	0	0	0	0	0	0	0	0	0	0	0	0	0	0	0	0	0	0	0	0	0	0	0	0	0	0	0	0	0	0	0	0	0	0	0	0	0	0
A2_47	D	Offshore	SECS	7.001575354	0	10.50236303		7.001575354	19.25433222	0	0	0	0	0	0	0	0	0	0	0	0	0	0	0	0	0	0	0	0	0	0	0	0	0	0	0	0	0	0	0	0	0	0	0	0	0	0	1.750393839	0
A2_48	N	Offshore	SECS	1.770224819	0	3.540449637		3.540449637	28.3235971	0	0	0	0	0	0	0	0	0	0	0	0	0	0	0	0	0	0	0	0	0	0	0	0	0	0	0	0	0	0	0	0	0	0	0	0	0	0	0	0
A2_49	D	Offshore	SECS	9.022556391	0	4.511278195		9.022556391	10.52631579	0	0	0	0	0	0	0	0	0	0	0	0	0	0	0	0	3.007518797	0	0	0	0	0	0	0	7.518796992	0	7.518796992	0	0	0	0	0	0	0	0	0	0	0	0	0
A2_51	N	Offshore	SECS	4.112405757	0	4.112405757		8.224811515	9.595613434	0	0	0	0	0	0	0	0	0	0	0	0	0	0	0	0	1.370801919	0	0	0	0	0	0	0	1.370801919	0	1.370801919	0	0	0	0	0	0	0	1.370801919	0	0	0	0	0
A2_52	N	Offshore	SECS	4.974299453	0	1.658099818		0	13.26479854	0	0	0	0	0	0	0	0	0	0	0	0	0	0	0	0	0	0	0	0	0	0	0	0	1.658099818	0	1.658099818	0	0	0	0	0	0	0	0	0	0	0	0	0
A2_53	D	Slope	SECS	6.210215805	0	2.070071935		36.22625886	8.28028774	0	0	0	0	0	0	0	0	0	0	0	0	0	0	0	0	2.070071935	0	0	0	0	0	0	0	3.105107902	1.035035967	4.14014387	0	0	0	0	0	0	0	0	0	0	0	1.035035967	0
A2_54	N	Slope	Transition	0	0	4.669079024		5.83634878	8.170888292	0	0	0	0	0	0	0	0	0	0	0	0	0	0	0	0	0	0	0	0	0	0	0	0	0	1.167269756	1.167269756	0	0	0	0	0	0	0	0	0	0	0	0	0
A2_55	D	Slope	SECS	8.51607409	0	3.193527784		38.3223334	26.61273153	0	0	0	0	0	0	0	0	0	0	0	0	0	0	0	0	0	0	0	0	0	0	0	0	1.064509261	1.064509261	2.129018522	0	0	0	0	0	0	0	0	0	0	0	1.064509261	0
A2_56	N	Slope	WBCS	1.338553693	0	2.677107385		0.669276846	5.354214771	0	0	0	0	0	0	0	0	0	0	0	0	0	0	0	0	0	0	0	0	0	0	0	0	0.669276846	0	0.669276846	0	0	0	0	0	0	0	0	0	0	0	0	0
A2_58	D	Slope	WBCS	2.568383203	0	3.852574804		0	19.26287402	0	0	0	0	0	0	0	0	0	0	0	0	0	0	0	0	0	0	0	0	0	0	0	0	0	0	0	0	0	0	0	0	0	0	0	0	0	0	0	0
A2_60	N	Slope	WBCS	2.385851898	0	0.596462975		2.982314873	4.771703796	0	0	0	0	0	0	1.192925949	0	0.596462975	0	0	0	0	0	0	0	0	0	0	0	0	0	0	0	0	0.596462975	0.596462975	0	0	0	0	0	0	0	0	0	0	0	0	0
A2_61	D	Slope	WBCS	3.153206417	0	9.45961925		0	22.07244492	0	0.788301604	0	0	0	0	0	0	0	0	0	0	0	0	0	0	0	0	0	0	0	0	0	0	1.576603208	0.788301604	2.364904813	0	0	0	0	0	0	0	0	0	0	0	0	0
[truncated: 79 more columns]
